# Supplementary material
Source: Springer Nature journal article supplement (https://www.springermedizin.de/resource/supplementary/13075_2009_2795_MOESM1_ESM.pdf/9692902)

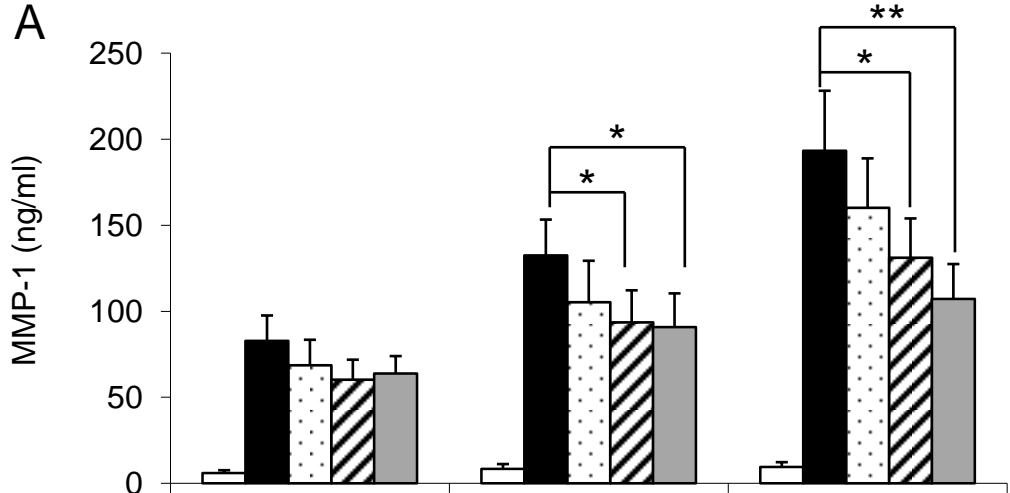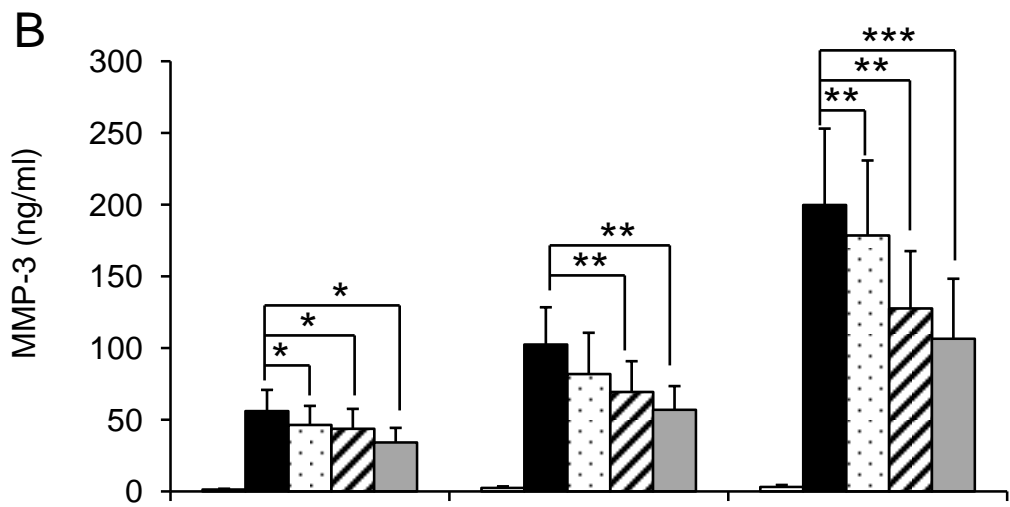

|                   |   |   |   |   |   |   |   |   |   |   |   |   |   |   |   |   |   |   |   |   |
|-------------------|---|---|---|---|---|---|---|---|---|---|---|---|---|---|---|---|---|---|---|---|
| IL-1 $\beta$      | - | + | + | + | + | - | + | + | + | + | - | + | + | + | + | - | + | + | + | + |
| IFN- $\gamma$ 0.1 | - | - | + | - | - | - | - | + | - | - | - | - | + | - | - | - | - | + | - | - |
| IFN- $\gamma$ 1   | - | - | - | + | - | - | - | - | + | - | - | - | - | + | - | - | - | - | + | - |
| IFN- $\gamma$ 10  | - | - | - | - | + | - | - | - | - | + | - | - | - | - | + | - | - | - | - | + |

24 hours

48 hours

72 hours

Supplement: MOESM1 [file 9692902]
